# Supplementary material for: The one-electron reduction of dithiolate and diselenolate ligands
Source: Royal Society of Chemistry journal article supplement (doi:10.1039/c4cp01105h), 2014-01-01
Supplement: c4cp01105h1.pdf [file c4cp01105h1.pdf]

## **The One-Electron Reduction of Dithiolate and Diselenolate Ligands.**

Eric A. C. Bushnell, Thomas D. Burns and Russell J. Boyd\*

Department of Chemistry, Dalhousie University, Halifax, Nova Scotia, Canada, B3H 4R2. Email:  
russell.boyd@dal.ca

### **Supplementary Information**

**(Tables S1 and S2, 3 pages in total)**

**Table S1.** The absolute C=C, C–S and C-Se bond lengths for all oxidized and reduced species.

| Selenium | Ox    |       | Red   |       | $\Delta r(\text{C}=\text{C})$ | $\Delta r(\text{C}-\text{Se})$ |
|----------|-------|-------|-------|-------|-------------------------------|--------------------------------|
|          | C=C   | C-Se  | C=C   | C-Se  |                               |                                |
| H        | 1.343 | 1.897 | 1.351 | 1.918 | 0.009                         | 0.020                          |
| 1        | 1.406 | 1.856 | 1.367 | 1.929 | -0.039                        | 0.073                          |
| 2        | 1.421 | 1.841 | 1.400 | 1.895 | -0.022                        | 0.054                          |
| 3        | 1.363 | 1.891 | 1.392 | 1.907 | 0.029                         | 0.016                          |
| 4        | 1.370 | 1.886 | 1.390 | 1.898 | 0.021                         | 0.012                          |
| 5        | 1.411 | 1.901 | 1.441 | 1.918 | 0.030                         | 0.017                          |
| 6        | 1.419 | 1.883 | 1.452 | 1.887 | 0.033                         | 0.004                          |
| 7        | 1.434 | 1.889 | 1.476 | 1.899 | 0.042                         | 0.010                          |

| Sulphur | Ox    |       | Red   |       | $\Delta r(\text{C}=\text{C})$ | $\Delta r(\text{C}-\text{S})$ |
|---------|-------|-------|-------|-------|-------------------------------|-------------------------------|
|         | C=C   | C-S   | C=C   | C-S   |                               |                               |
| H       | 1.404 | 1.685 | 1.360 | 1.768 | -0.044                        | 0.083                         |
| 1'      | 1.423 | 1.696 | 1.374 | 1.770 | -0.049                        | 0.074                         |
| 2'      | 1.437 | 1.681 | 1.406 | 1.737 | -0.031                        | 0.056                         |
| 3'      | 1.438 | 1.680 | 1.400 | 1.745 | -0.038                        | 0.065                         |
| 4'      | 1.374 | 1.737 | 1.401 | 1.738 | 0.027                         | 0.001                         |
| 5'      | 1.464 | 1.705 | 1.454 | 1.753 | -0.010                        | 0.048                         |
| 6'      | 1.423 | 1.731 | 1.465 | 1.725 | 0.042                         | -0.006                        |
| 7'      | 1.437 | 1.735 | 1.489 | 1.734 | 0.052                         | -0.001                        |

**Table S2.** The calculated SDs for the carbon, sulphur and selenium atoms for all oxidized species.

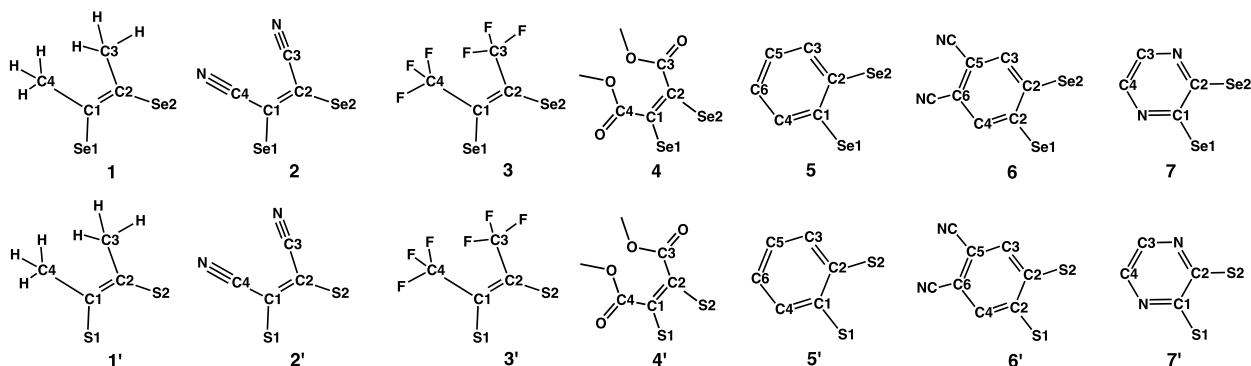

|     |      |      |       |       |       |       |       |
|-----|------|------|-------|-------|-------|-------|-------|
|     | 1    | 2    | 3     | 4     | 5     | 6     | 7     |
| C1  | 0.07 | 0.01 | -0.15 | -0.24 | -0.36 | -0.48 | -0.05 |
| Se1 | 0.43 | 0.47 | 0.55  | 0.56  | 0.55  | 0.57  | 0.55  |
| C2  | 0.07 | 0.01 | -0.15 | -0.24 | -0.36 | -0.48 | -0.05 |
| Se2 | 0.43 | 0.47 | 0.55  | 0.56  | 0.55  | 0.57  | 0.55  |
| C3  |      |      | 0.10  | 0.18  | 0.28  | 0.30  |       |
| C4  |      |      | 0.10  | 0.18  | 0.28  | 0.30  |       |
| C5  |      |      |       |       |       | 0.10  |       |
| C6  |      |      |       |       |       | 0.10  |       |
|     |      |      |       |       |       |       |       |
|     | 1'   | 2'   | 3'    | 4'    | 5'    | 6'    | 7'    |
| C1  | 0.11 | 0.05 | 0.09  | -0.23 | 0.05  | -0.43 | -0.07 |
| S1  | 0.40 | 0.43 | 0.44  | 0.62  | 0.42  | 0.64  | 0.60  |
| C2  | 0.11 | 0.05 | 0.09  | -0.23 | 0.05  | -0.43 | -0.07 |
| S2  | 0.40 | 0.43 | 0.44  | 0.62  | 0.42  | 0.64  | 0.60  |
| C3  |      |      |       | 0.11  |       | 0.20  |       |
| C4  |      |      |       | 0.11  |       | 0.20  |       |
| C5  |      |      |       |       |       | 0.08  |       |
| C6  |      |      |       |       |       | 0.08  |       |
